# Supplementary material
Source: PubMed Central journal article supplement (PMC3860814)
Supplement: NIHMS426630-supplement-04.pdf [file NIHMS426630-supplement-04.pdf]

| OTU ID | Phylum     | Class      | Order         | Family          | Genus        | Species      | GenBank Acc | Greengenes ID | pvals_good  | meanF709OVA+ D011.10+ TR Cell Group | meanF709OVA+O VA /SEB Groups |
|--------|------------|------------|---------------|-----------------|--------------|--------------|-------------|---------------|-------------|-------------------------------------|------------------------------|
| 16     | Firmicutes | Clostridia | Clostridiales | Lachnospiraceae | unclassified | unclassified | EF096140    | 191785        | 0.002641739 | 3389.6                              | 3064.111111                  |
| 274    | Firmicutes | Clostridia | Clostridiales | Lachnospiraceae | unclassified | unclassified | AY984484    | 126076        | 0.009322376 | 3043.4                              | 2372.777778                  |
| 675    | Firmicutes | Clostridia | Clostridiales | Lachnospiraceae | unclassified | unclassified | EF096987    | 194051        | 0.013637725 | 1856                                | 435.5555556                  |
| 2160   | Firmicutes | Clostridia | Clostridiales | Lachnospiraceae | unclassified | unclassified | EU506487    | 260705        | 0.009322376 | 2054.2                              | 1291.555556                  |
| 2199   | Firmicutes | Clostridia | Clostridiales | Lachnospiraceae | Dorea        | unclassified | EU510853    | 265754        | 0.002699796 | 752.2                               | 298.8888889                  |
| 2663   | Firmicutes | Clostridia | Clostridiales | Lachnospiraceae | Clostridium  | unclassified | AY992468    | 129526        | 0.038765574 | 1554.6                              | 2167.555556                  |
| 3245   | Firmicutes | Clostridia | Clostridiales | Lachnospiraceae | unclassified | unclassified | AY992440    | 135500        | 0.013637725 | 2957.8                              | 2028.444444                  |
| 3297   | Firmicutes | Clostridia | Clostridiales | Lachnospiraceae | unclassified | unclassified | DQ014740    | 135329        | 0.002699796 | 3205                                | 844                          |
| 3439   | Firmicutes | Clostridia | Clostridiales | Lachnospiraceae | Lachnospira  | unclassified | EF099065    | 197605        | 0.004148197 | 2093.4                              | 692.5555556                  |
| 3714   | Firmicutes | Clostridia | Clostridiales | Lachnospiraceae | Clostridium  | unclassified | EU504190    | 258283        | 0.006269685 | 3028.6                              | 1783.555556                  |
| 3977   | Firmicutes | Clostridia | Clostridiales | Lachnospiraceae | unclassified | unclassified | EU655820    | 282552        | 0.002699796 | 2718.6                              | 1440.111111                  |
| 4314   | Firmicutes | Clostridia | Clostridiales | Lachnospiraceae | unclassified | unclassified | EU472497    | 297677        | 0.002670671 | 3383.8                              | 2559.777778                  |
| 4765   | Firmicutes | Clostridia | Clostridiales | Lachnospiraceae | unclassified | unclassified | EU845293    | 335032        | 0.006269685 | 3346.2                              | 3142                         |
| 5385   | Firmicutes | Clostridia | Clostridiales | Lachnospiraceae | Blautia      | unclassified | EU467221    | 290412        | 0.004148197 | 1279.4                              | 346.2222222                  |
| 6042   | Firmicutes | Clostridia | Clostridiales | Lachnospiraceae | unclassified | unclassified | EU510566    | 277090        | 0.038765574 | 1327                                | 817.7777778                  |
| 6078   | Firmicutes | Clostridia | Clostridiales | Lachnospiraceae | unclassified | unclassified | DQ014905    | 131066        | 0.009167784 | 1209                                | 128                          |
| 6111   | Firmicutes | Clostridia | Clostridiales | Lachnospiraceae | Clostridium  | unclassified | EU510550    | 270765        | 0.027806895 | 801                                 | 1326                         |
| 6150   | Firmicutes | Clostridia | Clostridiales | Lachnospiraceae | unclassified | unclassified | EU655796    | 283186        | 0.006269685 | 2653.6                              | 1200.777778                  |
| 6176   | Firmicutes | Clostridia | Clostridiales | Lachnospiraceae | unclassified | unclassified | EU506249    | 268844        | 0.038765574 | 3093.4                              | 2437.888889                  |
| 6295   | Firmicutes | Clostridia | Clostridiales | Lachnospiraceae | unclassified | unclassified | EF098339    | 180805        | 0.006212643 | 344.8                               | 1944.888889                  |
| 6360   | Firmicutes | Clostridia | Clostridiales | Lachnospiraceae | unclassified | unclassified | DQ015311    | 131283        | 0.019630657 | 2851.4                              | 1697.888889                  |
| 6374   | Firmicutes | Clostridia | Clostridiales | Lachnospiraceae | unclassified | unclassified | EU508022    | 269317        | 0.002699796 | 2653.6                              | 1479.222222                  |
| 6664   | Firmicutes | Clostridia | Clostridiales | Lachnospiraceae | Clostridium  | unclassified | DQ824714    | 179311        | 0.002699796 | 3398.6                              | 3062.444444                  |
| 6798   | Firmicutes | Clostridia | Clostridiales | Lachnospiraceae | unclassified | unclassified | EU504406    | 264803        | 0.019630657 | 1895                                | 1374.444444                  |
| 7188   | Firmicutes | Clostridia | Clostridiales | Lachnospiraceae | unclassified | unclassified | AY990633    | 129785        | 0.038765574 | 3072.4                              | 2189                         |
| 7277   | Firmicutes | Clostridia | Clostridiales | Clostridiales   | Clostridium  | bolteae      | AY990174    | 134932        | 0.004148197 | 3047.6                              | 2225.222222                  |
| 7357   | Firmicutes | Clostridia | Clostridiales | Lachnospiraceae | unclassified | unclassified | EU510660    | 263382        | 0.002584451 | 3411.2                              | 3107                         |
| 7397   | Firmicutes | Clostridia | Clostridiales | Lachnospiraceae | unclassified | unclassified | DQ015661    | 137692        | 0.038765574 | 1313.8                              | 286.4444444                  |

|       |                |                     |                        |                     |                                 |              |          |        |             |        |             |
|-------|----------------|---------------------|------------------------|---------------------|---------------------------------|--------------|----------|--------|-------------|--------|-------------|
| 7438  | Firmicutes     | Clostridia          | Clostridiales          | Lachnospiraceae     | unclassified                    | unclassified | EU511837 | 260533 | 0.00924492  | 2692.4 | 1110        |
| 9492  | Firmicutes     | Bacilli             | Lactobacillales        | Leuconostocaceae    | Fructobacillus                  | unclassified | AY169967 | 101369 | 0.019630657 | 592.2  | 1139.333333 |
| 10166 | Firmicutes     | Bacilli             | Lactobacillales        | Lactobacillaceae    | Lactobacillus                   | unclassified | DQ815579 | 167922 | 0.038765574 | 681.4  | 1657.666667 |
| 12530 | Bacteroidetes  | Flavobacteria       | Flavobacteriales       | Flavobacteriaceae   | Sediminicola                    | unclassified | EF157264 | 238644 | 0.027806895 | 530.6  | 1566.333333 |
| 12579 | Bacteroidetes  | Flavobacteria       | Flavobacteriales       | Flavobacteriaceae   | unclassified                    | unclassified | EU003223 | 253574 | 0.019630657 | 2083   | 2592.888889 |
| 13747 | Nitrospirae    | Nitrospira          | Nitrospirales          | 29-Apr              | unclassified                    | unclassified | AM943596 | 261009 | 0.038765574 | 1561.6 | 2184.444444 |
| 18934 | Proteobacteria | Gammaproteobacteria | Enterobacteriales      | Enterobacteriaceae  | unclassified_Enterobacteriaceae | unclassified | EF406662 | 214508 | 0.013637725 | 712.6  | 173.3333333 |
| 18995 | Proteobacteria | Gammaproteobacteria | Aeromonadales          | Aeromonadaceae      | Aeromonas                       | unclassified | DQ303266 | 143929 | 0.038551579 | 1787.8 | 1035.333333 |
| 25419 | Proteobacteria | Gammaproteobacteria | Pseudomonadales        | Pseudomonadaceae    | Pseudomonas                     | unclassified | EU537183 | 287223 | 0.019630657 | 653    | 1115.222222 |
| 31188 | Proteobacteria | Deltaproteobacteria | Myxococcales           | 0319-6G20           | unclassified                    | unclassified | EU373907 | 264962 | 0.027806895 | 1381.4 | 1875.111111 |
| 31348 | Fibrobacteres  | Fibrobacteria       | P.palm C70             | unclassified        | unclassified                    | unclassified | EU283593 | 278037 | 0.027806895 | 2141.8 | 2681.777778 |
| 33236 | Firmicutes     | Clostridia          | Thermoanaerobacterales | SRB2                | unclassified                    | unclassified | AM778006 | 238092 | 0.013637725 | 1314   | 2051.777778 |
| 35118 | Firmicutes     | Clostridia          | Clostridiales          | Ruminococcaceae     | Oscillospira                    | unclassified | EU474940 | 289731 | 0.006269685 | 2636.4 | 2080.333333 |
| 35778 | Firmicutes     | Clostridia          | Clostridiales          | Ruminococcaceae     | Oscillibacter                   | unclassified | EU508276 | 264785 | 0.019630657 | 2480.8 | 1229.666667 |
| 36309 | Firmicutes     | Clostridia          | Clostridiales          | Ruminococcaceae     | unclassified                    | unclassified | EU622715 | 279949 | 0.027806895 | 2414.2 | 1521.666667 |
| 37223 | Firmicutes     | Clostridia          | Clostridiales          | Clostridiaceae      | Clostridium                     | unclassified | AB298753 | 213289 | 0.027806895 | 1317.6 | 2073.333333 |
| 37282 | Firmicutes     | Clostridia          | Clostridiales          | Lachnospiraceae     | unclassified                    | unclassified | EU459375 | 303222 | 0.038765574 | 1353.6 | 1735.888889 |
| 38557 | Firmicutes     | Clostridia          | Clostridiales          | Ruminococcaceae     | Eubacterium                     | unclassified | EU006202 | 236392 | 0.019496367 | 2399.2 | 1037.555556 |
| 38593 | Firmicutes     | Clostridia          | Clostridiales          | Lachnospiraceae     | unclassified                    | unclassified | EF406702 | 214116 | 0.006269685 | 3064.8 | 1826.111111 |
| 38911 | Firmicutes     | Clostridia          | Clostridiales          | Ruminococcaceae     | unclassified                    | unclassified | EU465630 | 300458 | 0.019630657 | 1037.4 | 1780.111111 |
| 39462 | Firmicutes     | Clostridia          | Clostridiales          | Clostridiaceae      | Clostridiaceae 1                | Clostridium  | AF332717 | 46741  | 0.019630657 | 1375   | 1970.111111 |
| 40170 | Firmicutes     | Erysipelotrichi     | Erysipelotrichales     | Erysipelotrichaceae | Allobaculum                     | unclassified | EF099557 | 194080 | 0.009322376 | 2584.4 | 658.4444444 |
| 40775 | Firmicutes     | Clostridia          | Clostridiales          | unclassified XIII   | Anaerovorax                     | unclassified | EU344440 | 277051 | 0.013637725 | 831    | 1199.666667 |
| 41007 | Firmicutes     | Clostridia          | Clostridiales          | Lachnospiraceae     | unclassified                    | unclassified | EU748342 | 308321 | 0.038765574 | 3049.6 | 2802.555556 |
| 41929 | Firmicutes     | Erysipelotrichi     | Erysipelotrichales     | Erysipelotrichaceae | Catenibacterium                 | unclassified | EU469379 | 296667 | 0.013637725 | 1880.6 | 934.2222222 |
| 42972 | Firmicutes     | Clostridia          | Clostridiales          | Ruminococcaceae     | unclassified                    | unclassified | EU470107 | 299345 | 0.004148197 | 1161   | 2261        |

|       |                |                     |                    |                     |                                |              |          |        |             |        |             |
|-------|----------------|---------------------|--------------------|---------------------|--------------------------------|--------------|----------|--------|-------------|--------|-------------|
| 45386 | Bacteroidetes  | Bacteroidia         | Bacteroidales      | Rikenellaceae       | RC9 gut group                  | unclassified | EU469558 | 298032 | 0.013637725 | 1795.2 | 2552.333333 |
| 45459 | Bacteroidetes  | Bacteroidia         | Bacteroidales      | Porphyromonadaceae  | Barnesiella                    | unclassified | EF406544 | 208409 | 0.006269685 | 2244.4 | 2911.444444 |
| 45595 | Bacteroidetes  | Bacteroidia         | Bacteroidales      | Porphyromonadaceae  | Barnesiella                    | unclassified | EF098500 | 194770 | 0.002699796 | 1223.4 | 2546.555556 |
| 45602 | Bacteroidetes  | Bacteroidia         | Bacteroidales      | Porphyromonadaceae  | unclassified_Porphromonadaceae | unclassified | EF406873 | 208486 | 0.002699796 | 272.4  | 1913.666667 |
| 45603 | Bacteroidetes  | Bacteroidia         | Bacteroidales      | Rikenellaceae       | unclassified                   | unclassified | EF099607 | 182382 | 0.002699796 | 1572.2 | 2710.333333 |
| 45627 | Bacteroidetes  | Bacteroidia         | Bacteroidales      | Rikenellaceae       | unclassified                   | unclassified | AY239412 | 97151  | 0.004148197 | 814.2  | 1924.888889 |
| 45655 | Bacteroidetes  | Bacteroidia         | Bacteroidales      | Rikenellaceae       | unclassified                   | unclassified | EU470252 | 295171 | 0.038765574 | 1584   | 2208        |
| 45661 | Bacteroidetes  | Bacteroidia         | Bacteroidales      | Rikenellaceae       | RC9 gut group                  | unclassified | EU468670 | 295780 | 0.004148197 | 884.4  | 1909.111111 |
| 45797 | Bacteroidetes  | Bacteroidia         | Bacteroidales      | Rikenellaceae       | unclassified                   | unclassified | EF686575 | 249825 | 0.019630657 | 1294   | 2209.444444 |
| 45924 | Bacteroidetes  | Bacteroidia         | Bacteroidales      | Rikenellaceae       | unclassified                   | unclassified | EF099074 | 180126 | 0.002699796 | 531.8  | 1681        |
| 45993 | Bacteroidetes  | Bacteroidia         | Bacteroidales      | Rikenellaceae       | RC9 gut group                  | unclassified | EU468654 | 298356 | 0.019496367 | 3316.6 | 3189.444444 |
| 46075 | Bacteroidetes  | Bacteroidia         | Bacteroidales      | Rikenellaceae       | unclassified                   | unclassified | AY991717 | 130984 | 0.019630657 | 1124.8 | 2207.666667 |
| 46134 | Bacteroidetes  | Bacteroidia         | Bacteroidales      | Porphyromonadaceae  | Barnesiella                    | unclassified | EF098889 | 180729 | 0.002699796 | 1183.4 | 2106.111111 |
| 46257 | Bacteroidetes  | Bacteroidia         | Bacteroidales      | Rikenellaceae       | unclassified                   | unclassified | AY990511 | 133135 | 0.006212643 | 177.8  | 1568.555556 |
| 46328 | Bacteroidetes  | Bacteroidia         | Bacteroidales      | BS11 gut group      | unclassified                   | unclassified | EU469555 | 302918 | 0.038765574 | 2039.4 | 2529.444444 |
| 46370 | Bacteroidetes  | Bacteroidia         | Bacteroidales      | Porphyromonadaceae  | Barnesiella                    | unclassified | EF099501 | 193408 | 0.013637725 | 908.4  | 2039.888889 |
| 46403 | Bacteroidetes  | Bacteroidia         | Bacteroidales      | Porphyromonadaceae  | Candidatus Symbiothrix         | unclassified | AB192209 | 144106 | 0.013637725 | 808.8  | 1915.777778 |
| 46591 | Bacteroidetes  | Bacteroidia         | Bacteroidales      | Rikenellaceae       | unclassified                   | unclassified | EF603044 | 227767 | 0.002670671 | 468.4  | 1586.222222 |
| 46809 | Bacteroidetes  | Bacteroidia         | Bacteroidales      | Rikenellaceae       | Alistipes                      | unclassified | EU510354 | 270248 | 0.013534674 | 3098   | 3265.888889 |
| 47087 | Bacteroidetes  | Bacteroidia         | Bacteroidales      | Prevotellaceae      | Prevotella                     | unclassified | EU475110 | 301251 | 0.006269685 | 1108   | 2044.222222 |
| 47145 | Bacteroidetes  | Bacteroidia         | Bacteroidales      | Porphyromonadaceae  | Parabacteroides                | unclassified | EU463133 | 294104 | 0.019630657 | 2030   | 2509.777778 |
| 47818 | Bacteroidetes  | Bacteroidia         | Bacteroidales      | Porphyromonadaceae  | Porphyromonas                  | unclassified | EU289079 | 246308 | 0.013637725 | 2318   | 2888.111111 |
| 48650 | Bacteroidetes  | Bacteroidia         | Bacteroidales      | S24-7               | unclassified                   | unclassified | EF097666 | 178662 | 0.006269685 | 2051.4 | 2689.222222 |
| 48818 | Bacteroidetes  | Bacteroidia         | Bacteroidales      | Porphyromonadaceae  | unclassified_Porphromonadaceae | unclassified | EF614751 | 227615 | 0.004148197 | 933.2  | 1931.555556 |
| 49867 | Actinobacteria | Actinobacteria      | Actinobacteridae   | Actinomycetales     | Frankineae                     | unclassified | EF016820 | 254924 | 0.038765574 | 868.2  | 1624.777778 |
| 51115 | Proteobacteria | Deltaproteobacteria | Desulfovibrionales | Desulfovibrionaceae | LE30                           | unclassified | DQ815907 | 170836 | 0.027806895 | 1947   | 753.555556  |

|       |                        |                     |                     |                   |              |              |          |        |             |        |             |
|-------|------------------------|---------------------|---------------------|-------------------|--------------|--------------|----------|--------|-------------|--------|-------------|
| 52056 | Actinobacteria         | Actinobacteria      | Solirubrobacterales | Conexibacteraceae | unclassified | unclassified | EU132646 | 243412 | 0.032705381 | 1048.4 | 1530.777778 |
| 54287 | Proteobacteria         | Deltaproteobacteria | Bdellovibrionales   | Bacteriovoraceae  | Peredibacter | unclassified | AM991200 | 278094 | 0.023258499 | 2300.4 | 2612.333333 |
| 56047 | Acidobacteria          | Acidobacteria       | Acidobacteriales    | Acidobacteriaceae | unclassified | unclassified | EU050885 | 256652 | 0.027806895 | 1954   | 2515        |
| 58618 | Candidate division OD1 | unclassified        | unclassified        | unclassified      | unclassified | unclassified | EU385818 | 266622 | 0.038765574 | 2161.8 | 2581        |
| 59261 | Candidate division OD1 | unclassified        | unclassified        | unclassified      | unclassified | unclassified | EU385705 | 265484 | 0.019630657 | 1247.8 | 1986.444444 |
| 59281 | GN02                   | GN07                | unclassified        | unclassified      | unclassified | unclassified | DQ234160 | 144617 | 0.027806895 | 833.8  | 1679.555556 |
