# Supplementary material
Source: PubMed Central journal article supplement (PMC3860814)
Supplement: NIHMS426630-supplement-14.pdf [file NIHMS426630-supplement-14.pdf]

## 31 **Supplementary Methods**

### 32 **Ovalbumin (OVA)-driven CD4<sup>+</sup> T cell cultures and intracellular cytokine staining**

33 Mesenteric lymph nodes cells from reconstituted and OVA-sensitized GF mice were  
34 labeled with the Violet CellTrace proliferative dye (Invitrogen; Grand Island, NY) and  
35 cultured with 200µg/ml OVA and 250pg/ml IL-2 for 72 hours. During the last 4 hours,  
36 cultured cells were stimulated with PdBU (500 ng/ml; Sigma-Aldrich, St. Louis MO) and  
37 lonomycin (500 ng/ml; Sigma-Aldrich) in the presence of Brefeldin A (1µg/ml; BD  
38 Biosciences – San Jose, CA). Cells were stained with the following conjugated  
39 antibodies: CD3 (145-2C11), CD4 (RM4-5), IL-4 (11B11) and IFN-γ (XMG1.2)  
40 (eBioscience, San Diego, CA). Intracellular cytokines were detected in Violet CellTrace<sup>+</sup>  
41 proliferating CD3<sup>+</sup>CD4<sup>+</sup> T cells by using Cytotfix/Cytoperm (BD Biosciences) buffers,  
42 according to the manufacturer's instructions. Stained cells were analyzed on a LSRII  
43 Fortessa cytometer (BD Biosciences) and data processed using Flowjo (Tree Star;  
44 Ashland, OR).

### 45 **PhyloChip™ data analysis**

46 *Pre-processing and Data Reduction.* Fluorescent images were captured with the  
47 GeneChip Scanner 3000 7G (Affymetrix, Santa Clara, CA). An individual array feature  
48 occupied approximately 8x8 pixels in the image file corresponding to a single probe  
49 25mer on the surface. To calculate the summary intensity for each feature on each  
50 array, the central 9 pixels of individual features were ranked by intensity and the 75%  
51 percentile was used. Probe intensities were background-subtracted and scaled to the  
52 PhyloChip™ Control Mix. Array fluorescence intensity was collected as integer values  
53 ranging from 0 to 65,536 ( $2^{16}$ ). Fluorescence intensities for sets of probes

54 complementing an operational taxonomic unit (OUT) were averaged after discarding the  
55 highest and lowest and the mean was  $\log_2$  transformed into numbers ranging from 0 to  
56 16. For compatibility with some statistical operations, the scores were multiplied by  
57 1000 then rounded, allowing a range of integers from 0 to 16,000. These values are  
58 referred to as the hybridization score (HybScore). For the complete distribution see  
59 Hazen et al, Supplemental Information <sup>1</sup>. The data was reduced to consider the  
60 bacterial taxa deemed present as described in Hazen *et al.* <sup>1</sup>. Taxa were filtered to  
61 those present in the majority of samples of at least one of the experimental groups and  
62 rank-normalized such that taxa in each are represented by their ranked HybScore within  
63 that sample only (rank 1 represents the lowest HybScore in that sample).

64 *Sample-to-Sample Distance Function.* All profiles were inter-compared in a pair-wise  
65 fashion to determine a dissimilarity score and results were stored as a distance matrix.  
66 The Weighted Unifrac distance measure was chosen because it utilizes the  
67 phylogenetic distance between OTUs as well as the abundance of those OTUs to  
68 compute a community-wide dissimilarity between any pair of profiles <sup>2, 3</sup>. Similar  
69 biological samples produce small Weighted Unifrac dissimilarity scores. When  
70 comparing the presence or absence of taxa between profiles, the Unweighted Unifrac  
71 distance measure was utilized.

72 *Statistical Analysis, Ordination, Clustering, and Classification Methods.* The differences  
73 between the microbial communities (the entire number of OTUs detected in any one  
74 comparison group versus another) was determined by the Adonis test, which is a  
75 permutation test based on a dissimilarity matrix, in this case measured by weighted  
76 UniFrac. Because the Adonis test considers the multidimensional structure of the data

77 (e.g., compares entire microbial communities), it does not involve multiple hypotheses  
78 testing for each microbial taxon found within those communities.

79 Taxa found increased in their ranked HybScore in one category compared to the  
80 alternate categories were identified using the Kruskal-Wallis (KW) test. The aim of a KW  
81 filter in the context of this analysis was to reduce the dimensionality of the dataset, and  
82 demonstrate that this reduced set of OTUs could still effectively discriminate between  
83 samples in terms of their microbial community structures by the ordination and  
84 clustering methods listed below.

85 Two-dimensional ordinations and hierarchical clustering maps of the samples in the  
86 form of dendrograms were created to graphically summarize the inter-sample  
87 relationships. To create dendrograms, the samples from the distance matrix are  
88 clustered hierarchically using the average-neighbor (HC-AN) method <sup>4</sup>. Non-Metric  
89 Multidimensional Scaling (NMDS) was employed to visualize relationships between  
90 samples by two-dimensional ordination plotting <sup>5</sup>. Ordination points are colored by  
91 highlighted groupings. Lists of significant taxa whose abundance characterizes each  
92 class is performed using Prediction Analysis for Microarrays (PAM), a classifier  
93 (supervised machine learning) based method that utilizes a nearest shrunken centroid  
94 method <sup>6</sup>.

95 *Phylogenetic Tree Visualization.* Bacterial families with OTUs found by the KW test to  
96 be differentially abundant between two comparison groups (e.g. allergen sensitized WT  
97 versus *I14raF709* mice) were identified, and the one OTU with the greatest difference  
98 between the two group means from each family was selected. For those families  
99 containing OTUs with both higher and lower abundance scores between the two

100 comparison groups, two OTUs were selected. A phylogenetic tree was constructed  
101 using FastTree, which was built using one representative 16S ribosomal DNA (rDNA)  
102 gene sequence from each of the OTUs selected from the Greengenes multiple  
103 sequence alignment <sup>7, 8</sup>. The Tree was displayed with iTOL software <sup>9</sup>.

#### 104 **16S rDNA sequencing methods and data analysis**

105 Summary of methodology. The microbial community structure in each stool sample was  
106 assessed by 16S amplicon sequencing on the Roche 454 platform. Sequencing data  
107 was processed through a bioinformatics pipeline to obtain distributions of OTUs for each  
108 sample. We tested differences in overall microbial community structure between stool  
109 samples from different groups using the Dirichlet Multinomial model and a likelihood  
110 ratio test <sup>10, 11</sup>. We used hierarchical clustering with the Bray-Curtis (BC) dissimilarity  
111 measure to visualize the differences between the distributions of OTUs in samples <sup>12</sup>.  
112 The BC measure quantifies the difference between a pair of ecosystems based on the  
113 species or OTU composition of samples. A BC value of zero indicates identical OTU  
114 distributions; a BC value of one indicates no overlap in the OTUs present in the pair of  
115 samples. We used a bootstrapping procedure to estimate 95% confidence intervals on  
116 BC measures, and thus evaluate the reproducibility of sample clusterings. Results were  
117 visualized with a dendrogram constructed using the bootstrapped values. We also used  
118 the UniFrac measure with Principal Coordinates Analysis (PCoA) to visualize  
119 differences between microbial communities in samples; this measure takes into account  
120 phylogenetic relationships among sequences and does not require clustering  
121 sequences into OTUs <sup>2, 3</sup>. Individual OTUs that discriminate between different groups  
122 were determined using a Random Forests supervised machine learning approach <sup>13, 14</sup>.

123 16S rDNA Amplicon sequencing. DNA pyrosequencing was performed by the Human  
124 Genome Sequencing Center at Baylor College of Medicine following protocols  
125 benchmarked for the Human Microbiome Project. The V3-V5 hypervariable regions of  
126 the 16S rRNA gene were amplified using primer 357F (5'-CCTACGGGAGGCAGCAG-  
127 3') modified with the addition of the 454 FLX-titanium adaptor "B" sequence  
128 (5'CCTATCCCCTGTGTGCCTTGGCAGTCTCAG-3') and primer 926R (5'-  
129 CCGTCAATTCMTTTRAGT-3') modified with the addition of unique 6-8 nucleotide  
130 barcode sequences and the 454 FLX-titanium adaptor "A" sequence (5'-  
131 CCATCTCATCCCTGCGTGTCTCCGACTCAG-3'). Barcode and adaptor sequences  
132 are found at  
133 [http://www.hmpdacc.org/doc/HMP MDG 454 16S Protocol V4 2 102109.pdf](http://www.hmpdacc.org/doc/HMP_MDG_454_16S_Protocol_V4_2_102109.pdf). PCR  
134 amplification was performed on 2 uL of DNA template in a total volume of 25 uL  
135 containing 1x AccuPrime Buffer II (Invitrogen Corp., Carlsbad, CA), 320 uM of each  
136 primer, and 0.03 U/uL AccuPrime High Fidelity *Taq* polymerase. Reactions were  
137 heated at 95°C for 2 min followed by 30 cycles of 95°C for 20 sec, 50°C for 30 sec, and  
138 72°C for 5 min. The concentration of amplicons in each reaction was determined in  
139 triplicate using the PicoGreen fluorescent assay (Invitrogen Corp.) and amplicons were  
140 pooled before being sequenced via a multiplexed 454-FLX-titanium pyrosequencing run  
141 according to manufacturer's specifications.

142 *Bioinformatics for 16S data.* Sequences were pre-processed using custom scripts and  
143 the packages mothur, CloVR, and QIIME<sup>15-17</sup>. Filtering criteria were: no ambiguous  
144 bases, maximum homopolymer length of 8, 1 base difference allowed for barcode  
145 matches, and 2 base differences allowed for primer matches. Each sample had

146 approximately 3000 reads after filtering. Sequences were trimmed based on a minimum  
147 average quality score of 35 over a window of length 50 nt, and clustered into OTUs with  
148 a similarity threshold of 95%.

149 *Testing for differences in OTU distributions between groups.* OTU relative abundances  
150 were assumed to follow the Dirichlet Multinomial (DM) distribution<sup>1,2</sup>. To test for  
151 differences in overall community structure between two groups, denoted A and B, we  
152 used a likelihood ratio test:

$$153 \quad S = -2 \ln \left\{ \frac{P(X_A, X_B | M_{A+B})}{[P(X_A | M_A) P(X_B | M_B)]} \right\}$$

154 Here,  $X_A$  and  $X_B$  represent the set of vectors of OTU counts for groups A and B  
155 respectively.  $M_{A+B}$  represents the DM model estimated from the combined groups, and  
156  $M_A$  and  $M_B$  the corresponding DM models estimated from the separate groups. DM  
157 parameters were estimated using the Maximum Likelihood method. The  $S$  statistic  
158 asymptotically follows a  $\chi^2$  distribution with degrees of freedom equal to the number of  
159 OTUs in the samples.

160 *Clustering and visualizing samples.* Bootstrapping was performed to standardize the  
161 effects of differing numbers of sequencing reads between samples, and to obtain  
162 estimates of the variability of dissimilarity measures between samples. For each pair of  
163 samples  $i$  and  $j$ ,  $m$  reads were drawn independently and with replacement, and the  
164 Bray-Curtis Dissimilarity measure<sup>3</sup> was calculated between the bootstrapped reads. We  
165 set  $m$  equal to the median number of sequencing reads over all samples, and repeated  
166 the bootstrapping procedure on each pair of samples 10,000 times. The 95%  
167 confidence interval for each sample pair was then estimated from the empirical

168 distribution of values. An average linkage dendrogram was constructed using the 95<sup>th</sup>  
169 centile values between nodes.

170 *Finding OTUs that discriminate between groups.* To find OTUs discriminating between  
171 groups, we used Random Forests<sup>5</sup> (RF) with a wrapper feature based method as  
172 implemented in the Boruta<sup>6</sup> package. Briefly, RF is an ensemble based classification  
173 method that uses multiple weak classifier decision trees. An importance measure is  
174 calculated for each feature (OTU) based on the loss of accuracy in classification. The  
175 statistical significance of the importance measure is determined using a permutation  
176 based method.

## 177 **16S rDNA Pyrosequencing Analysis: Results**

178 *Comparisons between sensitized and sham sensitized Il4raF709 mice.* We assessed  
179 the difference in overall microbial community structure among stool samples from  
180 Il4raF709 homozygous mutant mice sensitized with OVA or sham sensitized with PBS.  
181 The distributions of OTUs differed significantly between the groups (Dirichlet  
182 Multinomial model,  $p$ -value =  $< 10^{-20}$ ). BC dissimilarity dendrograms and UniFrac PCoA  
183 plots visualizing differences in overall microbial community structure between groups  
184 showed overall separation between the two groups, although two mutant PBS samples  
185 were close to outlying mutant OVA samples (**Figure E1A, B**). Several bacterial families  
186 and genera were found to discriminate between the groups using a supervised machine  
187 learning based method, including OTUs classifying to the genera Clostridium,  
188 Bacteroides, Alistipes and Streptococcus (**Table E3**).

189 *Comparisons between unsensitized WT versus Il4raF709 mutant mice.* We assessed  
190 the difference in overall microbial community structure between stool samples from

191 unsensitized WT and *I4raF709* homozygous mutant littermate mice, and found that the  
192 distributions of OTUs differed significantly between the two groups (Dirichlet Multinomial  
193 model  $P$  value =  $7 \times 10^{-11}$ ). We visualized differences in overall microbial community  
194 structure between the two groups using a dendrogram with the BC measure (**Figure**  
195 **E4A**) and a UniFrac PCoA plot (**Figure E4B**). Consistent across both techniques, the  
196 samples from the *I4raF709* homozygous mutant mice overall clustered together,  
197 although few WT samples clustered with outlying *I4raF709* samples. These findings  
198 suggest that differences between the two groups were relatively subtle and not well-  
199 visualized using a dimensionality reduction method. To explore differences in individual  
200 OTUs, we used a supervised machine learning based method, and found differences in  
201 several OTUs, including those classifying to the genera *Helicobacter*, *Clostridium*,  
202 *Lactobacillus* and *Odoribacter* (data not shown).

203 *Comparisons between WT and *I4raF709* mutant sensitized mice.* We assessed the  
204 difference in overall microbial community structure among stool samples from *I4raF709*  
205 homozygous mutant mice and WT controls sensitized with OVA. The distributions of  
206 OTUs differed significantly between each group (Dirichlet Multinomial model,  $P$  value =  
207  $< 10^{-20}$ ). BC dissimilarity dendrograms and UniFrac PCoA plots visualizing differences in  
208 overall microbial community structure between groups showed clear separation  
209 between the WT and mutant OVA groups (**Figure E5A, B**). Several bacterial families  
210 and genera were found to optimally discriminate between the groups using a supervised  
211 machine learning-based method, including *Alistipes*, *Clostridium*, *Anaeroplasma*,  
212 *Lachnobacterium*, and *Bacteroides* (**Table E9**).



213 Assessing recolonization of WT GF mice by flora of OVA-sensitized WT versus mutant  
214 mice. We assessed the difference in overall microbial community structure between  
215 stool samples from the two groups of recipient mice collected 8 weeks after colonization  
216 (at the end of the OVA sensitization period). The distributions of OTUs in stool samples  
217 from the group of mice receiving donor microbiota from allergen-sensitized mutant mice  
218 differed significantly from those of the group receiving donor microbiota from WT mice  
219 (Dirichlet Multinomial model<sup>1,2</sup>  $P$  value  $< 10^{-20}$ ). We visualized differences between  
220 samples using a dendrogram with the BC measure (**Figure 8A**).

221 The samples from the group of mice that received donor microbiota from WT mice all  
222 clustered tightly, and clustered with the respective donor sample. The samples from the  
223 group of mice that received donor microbiota from allergen-sensitized *Il4raF709* mutant  
224 mice also clustered closely with one another, but were distinct from those of WT flora  
225 recipients. The donor sample from allergen-sensitized mutant mice essentially clustered  
226 separately, but was closer to its respective recipient samples in aggregate than it was to  
227 the other samples.

## 228 **Supplementary Figure Legends**

229 **Figure E1.** The microbial signature and dysbiosis associated with the allergen  
230 sensitization of *Il4raF709* mice is reproduced by 16S rDNA pyrosequencing. **A.**  
231 Agglomerative clustering of fecal samples from OVA- and sham PBS sensitized  
232 *Il4raF709* mice based on 16S OTUs Samples were clustered based on bootstrapped  
233 BC dissimilarity values computed on the relative abundances of OTUs in each sample.  
234 BC = 0 indicates identical microbial communities; BC = 1 indicates communities with no  
235 overlapping OTUs. Heights of lines on the dendrogram indicate bootstrapped BC values

236 at the 95<sup>th</sup> percentile. **B.** Principal Coordinate Analysis (PCoA) plot with the UniFrac  
237 measure for stool samples from OVA and sham PBS sensitized *I4raF709* mice. The  
238 unweighted UniFrac measure was used, which emphasizes qualitative phylogenetic  
239 differences between samples.  $n=5$  for the *I4raF709* OVA group versus 9 mice for the  
240 PBS sham sensitized *I4raF709* group. Dirichlet Multinomial model,  $p\text{-value} = < 10^{-20}$ .

241 **Figure E2.** T<sub>R</sub> cell-treatment resets the microbiota of allergen-sensitized *I4raF709* mice  
242 into a new baseline distinct from that of sham sensitized and treated control *I4raF709*  
243 mice. **A.** NMDS based on Weighted Unifrac distance between samples of PBS-  
244 sensitized mice ( $n=4$ ) versus those of T<sub>R</sub>-cell treated ( $n=5$ ), OVA-sensitized mice, based  
245 on the 786 taxa whose abundance was significantly different between groups using the  
246 Kruskal-Wallis (KW) test. **B.** Hierarchical Clustering based on Weighted Unifrac  
247 distance between samples. **C.** Nearest shrunken centroid analysis of OTUs that best  
248 characterize the difference between allergen-sensitized versus tolerant groups. **D.**  
249 Representation of the abundance of the OTUs identified by the nearest shrunken  
250 centroid analysis using the PAM method.

251 **Figure E3.** The microbiota of sham-sensitized *I4raF709* and WT mice are distinct. **A.**  
252 NMDS based on Weighted Unifrac distance between samples of PBS-sensitized  
253 *I4raF709* mice ( $n=4$ ) versus those of WT, PBS-sensitized mice ( $n=4$ ), based on the 813  
254 taxa whose abundance was significantly different between groups using the KW test. **B.**  
255 Hierarchical Clustering based on Weighted Unifrac distance between samples. **C.**  
256 Nearest shrunken centroid analysis of OTUs that best characterize the difference  
257 between allergen-sensitized versus tolerant groups. **D.** Representation of the

258 abundance of the OTUs identified by the nearest shrunken centroid analysis using the  
259 PAM method.

260 **Figure E4.** *I4raF709* mice conserve their specific microbiota signature when cohoused  
261 with WT littermates. **A.** Agglomerative clustering of stool samples from *I4raF709* ( $n=12$ )  
262 and WT ( $n=5$ ) mice based on 16S OTUs. Samples were clustered based on  
263 bootstrapped BC dissimilarity values computed on the relative abundances of OTUs in  
264 each sample. BC = 0 indicates identical microbial communities; BC = 1 indicates  
265 communities with no overlapping OTUs. Heights of lines on the dendrogram indicate  
266 bootstrapped BC values at the 95<sup>th</sup> percentile. **B.** PCoA plot with the UniFrac measure  
267 for stool samples from *I4raF709* and WT littermate mice. The unweighted UniFrac  
268 measure was used, which emphasizes qualitative phylogenetic differences between  
269 samples. Dirichlet Multinomial model  $P$  value =  $7 \times 10^{-11}$ .

270 **Figure E5.** The microbiota signatures of allergen-sensitized *I4raF709* and WT mice are  
271 distinct by 16S rDNA pyrosequencing. **A.** Agglomerative clustering of stool samples  
272 from ovalbumin sensitized *I4raF709* mutant ( $n=5$ ) and WT ( $n=4$ ) mice based on 16S  
273 OTUs. Samples were clustered based on bootstrapped BC dissimilarity values  
274 computed on the relative abundances of OTUs in each sample. BC = 0 indicates  
275 identical microbial communities; BC = 1 indicates communities with no overlapping  
276 OTUs. Heights of lines on the dendrogram indicate bootstrapped BC values at the 95<sup>th</sup>  
277 percentile. **B.** PCoA plot with the UniFrac measure for stool samples from ovalbumin  
278 sensitized mutant and WT mice. The unweighted UniFrac measure was used, which  
279 emphasizes qualitative phylogenetic differences between samples. Dirichlet Multinomial  
280 model,  $p$ -value =  $< 10^{-20}$ .

281 **Figure E6.** The microbiota signatures of allergen- (OVA +OVA/SEB) sensitized  
282 *I4raF709* and WT mice are distinct. **A.** NMDS based on Weighted Unifrac distance  
283 between samples of OVA/SEB-sensitized WT ( $n=6$ ) versus OVA+OVA/SEB sensitized  
284 *I4raF709* mice ( $n=9$ ), based on the 430 taxa whose abundance was significantly  
285 different between groups using the KW test. **B.** Hierarchical Clustering based on  
286 Weighted Unifrac distance between samples. **C.** Nearest shrunken centroid analysis of  
287 OTUs that best characterize the difference between the groups. **D.** Representation of  
288 the abundance of the OTUs identified by the nearest shrunken centroid analysis using  
289 the PAM method. **E.** Venn diagram showing the abundance levels of different OTUs in  
290 relation to the sensitization state of WT and *I4raF709* mice. The labels define the  
291 abundance states of sets of OTUs in relation to specific comparison groups, e.g. F709  
292 OVA+OVA/SEB<F709 PBS identifies those OTUs that are less abundant in allergen  
293 sensitized (with OVA or with OVA/SEB) *I4raF709* mice as compared to sham (PBS)  
294 sensitized mice. The number of OTUs thus identified is indicated in parentheses.  
295 Spheres indicate intersections between two sets, while the colored webs show which  
296 intersection of sets form the spheres. **F.** Contingency table representation of the results  
297 shown in the Venn diagram.  $P<0.0001$  by the  $X^2$  test (excluding the 2993 OTUs that did  
298 not change upon sensitization in both WT and *I4raF709* mice).

299 **Table E1.** Annotations of Prediction Analysis for Microarrays (PAM)-selected bacterial  
300 taxa that discriminate between sham and allergen (OVA and OVA/SEB-sensitized)  
301 *I4raF709* mice (see **Figure 3C, D**).

302 **Table E2.** Annotations of bacterial taxa showing significantly different abundances  
303 between sham and allergen-sensitized *I4raF709* mice, as shown in the phylogenetic  
304 tree in **Figure 4**.

305 **Table E3.** Annotations of bacterial genera that optimally discriminate between sham  
306 and allergen-sensitized *I4raF709* mice, as revealed by 16S rDNA pyrosequencing  
307 (**Figure E1**) and determined using the Random Forest machine learning method.

308 **Table E4.** Annotations of PAM-selected bacterial taxa that discriminate between  
309 allergen (OVA- and OVA/SEB)-sensitized versus T<sub>R</sub>-cell treated and OVA-sensitized  
310 mice. The taxa selected correspond to those graphically presented in **Figure 5C, D**.

311 **Table E5.** Annotations of bacterial taxa showing significantly different abundances  
312 between sham and allergen-sensitized *I4raF709* mice, as shown in the phylogenetic  
313 tree in **Figure 6**.

314 **Table E6.** Annotations of PAM-selected bacterial taxa that discriminate between T<sub>R</sub> cell-  
315 treated, allergen (OVA)- and sham-sensitized *I4raF709* mice. The taxa selected  
316 correspond to those graphically presented in **Figure E2C, D**.

317 **Table E7.** Annotations of PAM-selected bacterial taxa that discriminate between sham-  
318 and allergen (OVA/SEB)-sensitized WT mice. The taxa selected correspond to those  
319 graphically presented in **Figure E3C, D**.

320 **Table E8.** Annotations of PAM-selected bacterial taxa that discriminate between  
321 allergen (OVA/SEB)-sensitized WT and *I4raF709* mice. The taxa selected correspond  
322 to those graphically presented in **Figure 7C, D**.

323 **Table E9.** Annotations of bacterial genera that optimally discriminate between allergen-  
324 sensitized WT versus *I4raF709* mice, as revealed by 16S rDNA pyrosequencing  
325 (Figure E5) and determined using the Random Forest machine learning method.

## 326 **Supplementary References**

- 327 1. Hazen TC, Dubinsky EA, DeSantis TZ, Andersen GL, Piceno YM, Singh N, et al.  
328 Deep-sea oil plume enriches indigenous oil-degrading bacteria. *Science* 2010;  
329 330:204-8.
- 330 2. Lozupone C, Hamady M, Knight R. UniFrac--an online tool for comparing  
331 microbial community diversity in a phylogenetic context. *BMC Bioinformatics*  
332 2006; 7:371.
- 333 3. Lozupone C, Knight R. UniFrac: a new phylogenetic method for comparing  
334 microbial communities. *Appl Environ Microbiol* 2005; 71:8228-35.
- 335 4. Legendre P, Legendre L. *Numerical ecology*. 2nd English ed. Amsterdam ; New  
336 York: Elsevier; 1998.
- 337 5. Shepard RN. Multidimensional scaling, tree-fitting, and clustering. *Science* 1980;  
338 210:390-8.
- 339 6. Tibshirani R, Hastie T, Narasimhan B, Chu G. Diagnosis of multiple cancer types  
340 by shrunken centroids of gene expression. *Proc Natl Acad Sci U S A* 2002;  
341 99:6567-72.
- 342 7. Price MN, Dehal PS, Arkin AP. FastTree 2--approximately maximum-likelihood  
343 trees for large alignments. *PLoS One* 2010; 5:e9490.

- 344 8. DeSantis TZ, Hugenholtz P, Larsen N, Rojas M, Brodie EL, Keller K, et al.  
345 Greengenes, a chimera-checked 16S rRNA gene database and workbench  
346 compatible with ARB. *Appl Environ Microbiol* 2006; 72:5069-72.
- 347 9. Letunic I, Bork P. Interactive Tree Of Life (iTOL): an online tool for phylogenetic  
348 tree display and annotation. *Bioinformatics* 2007; 23:127-8.
- 349 10. Mosimann JE. On the compound multinomial distribution, the multivariate  $\beta$ -  
350 distribution, and correlations among proportions. *Biometrika* 1962; 49:65-82.
- 351 11. Tvedebrink T. Overdispersion in allelic counts and theta-correction in forensic  
352 genetics. *Theor Popul Biol* 2010; 78:200-10.
- 353 12. Bray JR, Curtis JT. An Ordination of the Upland Forest Communities of Southern  
354 Wisconsin. *Ecological Monographs* 1957; 27:325-49.
- 355 13. Breiman L. Random Forests. *Learning Machines* 2001; 45:5-32.
- 356 14. Kursu MB, Rudnicki WR. Feature selection with the boruta package. *J. Stat. Soft.*  
357 2010; 36:1-13.
- 358 15. Caporaso JG, Kuczynski J, Stombaugh J, Bittinger K, Bushman FD, Costello EK,  
359 et al. QIIME allows analysis of high-throughput community sequencing data. *Nat*  
360 *Methods* 2010; 7:335-6.
- 361 16. Schloss PD, Westcott SL, Ryabin T, Hall JR, Hartmann M, Hollister EB, et al.  
362 Introducing mothur: open-source, platform-independent, community-supported  
363 software for describing and comparing microbial communities. *Appl Environ*  
364 *Microbiol* 2009; 75:7537-41.

365 17. Angiuoli SV, Matalaka M, Gussman A, Galens K, Vangala M, Riley DR, et al.  
366 CloVR: a virtual machine for automated and portable sequence analysis from the  
367 desktop using cloud computing. BMC Bioinformatics 2011; 12:356.  
368
