# Supplementary material
Source: PubMed Central journal article supplement (PMC3860814)
Supplement: NIHMS426630-supplement-16.pdf [file NIHMS426630-supplement-16.pdf]

| OTU id | Phylum         | Class               | Order              | Family           | Genus               | Species      | GenBank Acc | Greengenes ID | pvals_good  | meanF709 PBS Group | meanF709OVA+ OVA /SEB Groups |
|--------|----------------|---------------------|--------------------|------------------|---------------------|--------------|-------------|---------------|-------------|--------------------|------------------------------|
| 1003   | Firmicutes     | Clostridia          | Clostridiales      | Lachnospiraceae  | Roseburia           | unclassified | EF096485    | 192000        | 0.030753561 | 1760               | 583.8888889                  |
| 1727   | Firmicutes     | Clostridia          | Clostridiales      | Lachnospiraceae  | unclassified        | unclassified | AY992372    | 133313        | 0.005478553 | 1274.5             | 505.4444444                  |
| 1920   | Firmicutes     | Clostridia          | Clostridiales      | Lachnospiraceae  | Marvinbryantia      | unclassified | EF097989    | 194878        | 0.013554666 | 476.25             | 1395.666667                  |
| 2199   | Firmicutes     | Clostridia          | Clostridiales      | Clostridiaceae   | Dorea               | unclassified | EU510853    | 265754        | 0.005478553 | 789.25             | 298.8888889                  |
| 2293   | Firmicutes     | Clostridia          | Clostridiales      | Lachnospiraceae  | unclassified        | unclassified | AY991947    | 130302        | 0.005478553 | 1404               | 682.1111111                  |
| 2727   | Firmicutes     | Clostridia          | Clostridiales      | Lachnospiraceae  | unclassified        | unclassified | DQ793370    | 180257        | 0.030753561 | 864.5              | 338.1111111                  |
| 2933   | Firmicutes     | Clostridia          | Clostridiales      | Lachnospiraceae  | Coprococcus         | unclassified | DQ808786    | 192305        | 0.008711913 | 2282.25            | 1487                         |
| 3204   | Firmicutes     | Clostridia          | Clostridiales      | Lachnospiraceae  | unclassified        | unclassified | EU503959    | 260375        | 0.013554666 | 2064.5             | 1707.888889                  |
| 3508   | Firmicutes     | Clostridia          | Clostridiales      | Lachnospiraceae  | unclassified        | unclassified | EU462087    | 295880        | 0.013554666 | 1038.25            | 502.2222222                  |
| 3739   | Firmicutes     | Clostridia          | Clostridiales      | Lachnospiraceae  | unclassified        | unclassified | EF096332    | 181789        | 0.020637558 | 671.25             | 1912.444444                  |
| 3887   | Firmicutes     | Clostridia          | Clostridiales      | Lachnospiraceae  | Pseudobutyri vibrio | unclassified | DQ794828    | 197557        | 0.008620018 | 1601.25            | 708.4444444                  |
| 4721   | Firmicutes     | Clostridia          | Clostridiales      | Lachnospiraceae  | Blautia             | unclassified | DQ804371    | 184276        | 0.005478553 | 1454.25            | 879.3333333                  |
| 5512   | Firmicutes     | Clostridia          | Clostridiales      | Lachnospiraceae  | unclassified        | unclassified | EU344425    | 277063        | 0.044568465 | 1278               | 938.2222222                  |
| 5963   | Firmicutes     | Clostridia          | Clostridiales      | Lachnospiraceae  | unclassified        | unclassified | EU508687    | 259665        | 0.005478553 | 2311               | 1592.222222                  |
| 6052   | Firmicutes     | Clostridia          | Clostridiales      | Lachnospiraceae  | Clostridium         | unclassified | EU511783    | 272969        | 0.005478553 | 1034.5             | 409.8888889                  |
| 6153   | Firmicutes     | Clostridia          | Clostridiales      | Lachnospiraceae  | unclassified        | unclassified | EU505504    | 267763        | 0.013554666 | 1183.75            | 811.2222222                  |
| 6808   | Firmicutes     | Clostridia          | Clostridiales      | Lachnospiraceae  | Roseburia           | unclassified | EF098644    | 199674        | 0.030524232 | 78                 | 333.1111111                  |
| 7405   | Firmicutes     | Clostridia          | Clostridiales      | Lachnospiraceae  | unclassified        | unclassified | EU504971    | 264472        | 0.044862271 | 115.5              | 1132.444444                  |
| 9680   | Firmicutes     | Bacilli             | Lactobacillales    | Lactobacillaceae | Lactobacillus       | unclassified | EU504798    | 273339        | 0.036982017 | 57.25              | 1728.222222                  |
| 12142  | Bacteroidetes  | Sphingobacteria     | Sphingobacteriales | Saprospiraceae   | unclassified        | unclassified | EF688369    | 243774        | 0.030753561 | 1343               | 562.5555556                  |
| 13243  | Elusimicrobia  | Elusimicrobia       | Rs-M47             | unclassified     | unclassified        | unclassified | AB089107    | 100887        | 0.005478553 | 2927.75            | 2571.555556                  |
| 18934  | Proteobacteria | Gammaproteobacteria | B38                | unclassified     | unclassified        | unclassified | EF406662    | 214508        | 0.020637558 | 526                | 173.3333333                  |
| 35554  | Firmicutes     | Clostridia          | Clostridiales      | Ruminococcaceae  | Oscillospira        | unclassified | EF098196    | 197863        | 0.030753561 | 1889.25            | 2477.222222                  |
| 36926  | Firmicutes     | Clostridia          | Clostridiales      | Ruminococcaceae  | Faecalibacterium    | unclassified | DQ804803    | 193505        | 0.044862271 | 2329.25            | 1999.222222                  |
| 38766  | Firmicutes     | Clostridia          | Clostridiales      | Catabacteriaceae | unclassified        | unclassified | DQ815614    | 166791        | 0.013554666 | 2606.75            | 1090.777778                  |

|       |                |                       |                   |                    |              |                        |          |        |             |         |             |
|-------|----------------|-----------------------|-------------------|--------------------|--------------|------------------------|----------|--------|-------------|---------|-------------|
| 38832 | Firmicutes     | Clostridia            | Clostridiales     | Catabacteriaceae   | unclassified | unclassified           | EU508608 | 276402 | 0.030753561 | 2743.5  | 2247.888889 |
| 39465 | Firmicutes     | Clostridia            | Clostridiales     | Clostridiaceae     | Sarcina      | unclassified           | EU774113 | 352729 | 0.030753561 | 2271.25 | 1751.777778 |
| 41031 | Firmicutes     | Clostridia            | Clostridiales     | Lachnospiraceae    | unclassified | unclassified           | EF436322 | 206909 | 0.005478553 | 2155    | 1460.666667 |
| 42301 | Firmicutes     | Clostridia            | Clostridiales     | Lachnospiraceae    | unclassified | unclassified           | EU465568 | 290338 | 0.030753561 | 2052    | 2566.666667 |
| 44071 | Bacteroidetes  | Bacteroidia           | Bacteroidales     | Bacteroidaceae     | Bacteroides  | unclassified           | DQ793474 | 196596 | 0.005478553 | 1799.25 | 664.3333333 |
| 45444 | Bacteroidetes  | Bacteroidia           | Bacteroidales     | Rikenellaceae      | unclassified | unclassified           | EU655810 | 284926 | 0.008711913 | 3379.75 | 2986.666667 |
| 45986 | Bacteroidetes  | Bacteroidia           | Bacteroidales     | Rikenellaceae      | unclassified | unclassified           | EF603052 | 232866 | 0.005478553 | 3281.5  | 3152.777778 |
| 46111 | Bacteroidetes  | Bacteroidia           | Bacteroidales     | Rikenellaceae      | unclassified | unclassified           | EF097070 | 190752 | 0.013554666 | 1444.75 | 500.2222222 |
| 46187 | Bacteroidetes  | Bacteroidia           | Bacteroidales     | Rikenellaceae      | unclassified | unclassified           | EF603016 | 228844 | 0.013554666 | 2456    | 582.7777778 |
| 46257 | Bacteroidetes  | Bacteroidia           | Bacteroidales     | Rikenellaceae      | unclassified | unclassified           | AY990511 | 133135 | 0.008711913 | 3098.5  | 1568.555556 |
| 46312 | Bacteroidetes  | Bacteroidia           | Bacteroidales     | Rikenellaceae      | unclassified | unclassified           | EU006270 | 245595 | 0.013554666 | 2978.25 | 3310.666667 |
| 46591 | Bacteroidetes  | Bacteroidia           | Bacteroidales     | Rikenellaceae      | unclassified | unclassified           | EF603044 | 227767 | 0.044862271 | 2253.5  | 1586.222222 |
| 46917 | Bacteroidetes  | Bacteroidia           | Bacteroidales     | Rikenellaceae      | Alistipes    | unclassified           | AY991932 | 133674 | 0.044862271 | 1606    | 3016.777778 |
| 48153 | Bacteroidetes  | Bacteroidia           | Bacteroidales     | Rikenellaceae      | Alistipes    | unclassified           | EU655823 | 280240 | 0.005478553 | 2688.5  | 747.4444444 |
| 48287 | Bacteroidetes  | Bacteroidia           | Bacteroidales     | Rikenellaceae      | unclassified | unclassified           | EF604721 | 233799 | 0.013554666 | 872.75  | 2167.222222 |
| 48371 | Bacteroidetes  | Bacteroidia           | Bacteroidales     | Porphyromonadaceae | Barnesiella  | unclassified           | AY992812 | 135659 | 0.005478553 | 1518.75 | 2784.888889 |
| 48689 | Bacteroidetes  | Bacteroidia           | Bacteroidales     | Porphyromonadaceae | Barnesiella  | unclassified           | EF096787 | 181385 | 0.005478553 | 1087    | 2471.666667 |
| 55191 | Proteobacteria | Deltaproteobacteria   | Sh765B-TzT-29     | unclassified       | unclassified | unclassified           | EU491396 | 268600 | 0.030753561 | 2055    | 1645.111111 |
| 59023 | Proteobacteria | Epsilonproteobacteria | Campylobacterales | Helicobacteraceae  | Helicobacter | Helicobacter hepaticus | EU508580 | 270331 | 0.008711913 | 1718.75 | 931.7777778 |
